# Supplementary material
Source: PubMed Central journal article supplement (PMC3706270)
Supplement: NIHMS442985-supplement-1.pdf [file NIHMS442985-supplement-1.pdf]

1

2 **Supplemental Table 1.** The animals used for this study were subject to a variety of  
3 treatments. Some were vaccinated, some were infected with versions of SIVmac239 that  
4 contained engineered mutations. These are listed in this table. Additionally, we have  
5 included references for the publications in which these animals are included and which  
6 epitopes were found in which animals.

7

8 **Supplemental Table 2.** Mamu-A1\*007:01 binding capacity of a panel of 42 endogenous  
9 ligands eluted and sequenced from soluble Mamu-A1\*007:01.

10

11 **Supplemental Table 3.** A complete list of all of the SIV<sub>mac239</sub>-derived peptides tested for  
12 Mamu-A1\*007:01-binding.

13

14 **Supplemental Table 4.** Comparison of peptide binding to Mamu A1\*007:01 versus HLA  
15 B\*3801.

16

17 **Supplemental Figure 1.** An amino acid alignment of the seven subtypes of the A1\*007:01  
18 family. Changes that do not affect the peptide-binding of the class I molecule are shown in  
19 yellow. Changes highlighted in red are residues that contact the peptide, and could  
20 therefore, affect the binding affinity.

21

22

23

24

1  
2  
3  
4  
5

**Supplemental Table 1. Animal treatments, infecting virus and epitopes recognized.**

| Animal ID | Vaccination                                      | Infecting virus                                          | Epitopes recognized                                                              | Reference               |
|-----------|--------------------------------------------------|----------------------------------------------------------|----------------------------------------------------------------------------------|-------------------------|
| r97113    | Gag,Tat,Rev, Nef by DNA/Ad5                      | SIVmac239                                                | Pol YL8, Pol YF10, Vpr NL11, Gag DL9, Gag DL10                                   | Wilson, et al 2006      |
| r99006    | -                                                | SIVmac239 with 2 A1*001:01 and B*017:01 escape mutations | Vpr NL11, Pol YL8                                                                | Friedrich et al 2004b   |
| rhas78    | -                                                | SIVmac239 with 3 B*017:01 escape mutations               |                                                                                  | Weinfurter et al, 2009  |
| r98030    |                                                  | SIVmac239 with 8 B*008:01 escape mutations               | Vpr NL11, Pol TL9, Pol YL8, Pol YF10; Pol IL9 and Env FL11(unconfirmed epitopes) | Valentine, et al., 2009 |
| rh2122    | Tat, Rev, Nef, A1*001:01 epitopes                | SIVmac239                                                | Vpr NL11                                                                         | Vogel et al., 2003      |
| r97073    | DNA all SIV pns MVA Gag, Pol, Env, Nef, Tat, Rev | SIVmac239                                                | Pol YL8, Pol SL10                                                                | Horton, et al., 2002    |
| rh2161    | DNA/NYVAC                                        | SIVmac239                                                |                                                                                  | Unpublished             |
| rh2001    | Gag, Nef, Vif by DNA/Ad5                         | -                                                        |                                                                                  | Wilson, pers. comm..    |
| r99088    | Gag, Nef, Vif by DNA/rYF/Ad5                     | -                                                        | Vif VL9                                                                          | Wilson, pers. comm..    |
| r96067    |                                                  | SIVmac239                                                | Vpr NL11                                                                         |                         |
| r98016    |                                                  | SIVmac239                                                | Vif SL11 (unconfirmed epitope)                                                   |                         |
| r99019    |                                                  | SIVmac239                                                | Pol SL10                                                                         |                         |
| r01064    |                                                  | SIVmac239                                                | Vpr NL11                                                                         |                         |
| r99005    |                                                  | SIVmac239                                                | Pol YL8                                                                          |                         |
| rhav77    |                                                  | SIVmac239                                                |                                                                                  |                         |
| r92086    |                                                  | SIVmac239                                                |                                                                                  |                         |
| r96107    |                                                  | SIVmac239                                                | Pol YL8, Pol SL10                                                                |                         |

6  
7

1  
2

**Supplemental Table 2. Mamu-A1\*007:01 binding capacity of ligands eluted from purified Mamu-A1\*007:01 molecules**

| Sequence    | Source protein                             | Length | IC50 nM |
|-------------|--------------------------------------------|--------|---------|
| DHSFSLEL    | cAMP response element regulatory protein   | 8      | 2.0     |
| NHIEPLKIQL  | thymidylate synthase                       | 10     | 10      |
| SHSHVGYTL   | Hematopoietic SH2 Domain Containing        | 9      | 10      |
| NHQDVAGVFAL | lysophospholipase-like 1                   | 11     | 12      |
| NHDFQALAL   | pumilio homolog 2                          | 9      | 13      |
| NHINVELSL   | Ribosomal protein L9                       | 9      | 13      |
| THYDHLIEL   | minichromosome maintenance complex 6       | 10     | 14      |
| NHAPSVQI    | PRO1670                                    | 8      | 17      |
| NHQGATPLVL  | ankyrin repeat domain 46                   | 10     | 18      |
| SHAQTVVL    | Ribosomal Protein S27                      | 8      | 18      |
| QHTPTSITL   | HDCMC04P                                   | 9      | 19      |
| NHIKYAVTT   | Coatomer subunit alpha                     | 9      | 20      |
| NHLREIWEL   | Protein Regulator of Cytokinesis 1         | 9      | 20      |
| HHGPMVAFA   | Cathepsin C                                | 9      | 21      |
| NHALPLPGF   | Solute carrier family 35 member B4         | 9      | 21      |
| NHVFPLLL    | Importin-8 (Imp8; RanBP8)                  | 8      | 25      |
| LHGWAFTL    | eukaryotic translation elongation factor 2 | 8      | 32      |
| NHQKDIQVL   | Meiotic Nuclear Division 5 Homolog A       | 9      | 32      |
| NHQKNLVEL   | programmed cell death 11                   | 9      | 33      |
| NHTALTVVM   | GARS Protein                               | 9      | 34      |
| HSPVVNEL    | HSPC120                                    | 8      | 37      |
| SHVSLVQLTL  | proliferating cell nuclear antigen         | 10     | 43      |
| DHAVSPRQL   | Cyclin D3                                  | 9      | 63      |
| NHMDGESLKL  | MORC3 Protein                              | 10     | 65      |
| NHSAASAMAL  | Muscleblind-like 3                         | 10     | 70      |
| VHAQIVSTL   | MON1 homolog B                             | 9      | 74      |
| NQQPSNYGPM  | hnRNP A2 protein                           | 10     | 77      |
| EHAHNMRVM   | Eukaryotic Translation Elongation Factor 2 | 9      | 84      |
| AHSPLAAQL   | KIAA1631 protein                           | 9      | 87      |
| NHVITKTMEL  | Nucleoporin                                | 10     | 93      |
| VHFIKPLLL   | ICB-1                                      | 9      | 103     |
| THFLQPIYL   | RNA adenosine deaminase                    | 9      | 129     |

|                |                                                |    |      |
|----------------|------------------------------------------------|----|------|
| SHSGREVV       | Membrane-Associated Ring Finger                | 9  | 133  |
| NHTIYINNM      | small ribonucleoprotein B                      | 9  | 137  |
| VHAELADVL      | chaperonin containing TCP1, subunit 6A         | 9  | 139  |
| NHISELVQL      | RAS guanyl releasing protein 1                 | 9  | 143  |
| NHTIYINNL      | small ribonucleoprotein A                      | 9  | 143  |
| VHMPKHPEL      | Ribosomal Protein S10                          | 9  | 180  |
| VHKPGPITL      | protein kinase C-binding protein RACK8         | 9  | 181  |
| THSSTFDAGAGIAL | glyceraldehyde-3-phosphate dehydrogenase       | 14 | 470  |
| SHSSDLSTI      | spectrin repeat containing, nuclear envelope 1 | 9  | 919  |
| NHVFFLL        | fatty acid desaturase 1                        | 7  | 1515 |

1  
2  
3

**Supplemental Table 3. Mamu A1\*007:01 binding of SIV-derived peptides**

| Protein | Amino acid positions | Length | Sequence    | IC50 (nM) |
|---------|----------------------|--------|-------------|-----------|
| Vpr     | 45-55                | 11     | NHIYNRHGDTL | 0.20      |
| Env     | 764-772              | 9      | WQIEYIHFL   | 3.2       |
| Pol     | 782-789              | 8      | YHSNVKEL    | 5.8       |
| Pol     | 782-791              | 10     | YHSNVKELVF  | 6.2       |
| Vif     | 22-29                | 8      | WHSLIKYL    | 10        |
| Pol     | 279-288              | 10     | WRMLIDFREL  | 10        |
| Vif     | 145-153              | 9      | VPSLQYLAL   | 13        |
| Pol     | 567-575              | 9      | THTNGVRL    | 13        |
| Env     | 795-802              | 8      | YQILQPIL    | 24        |
| Pol     | 332-340              | 9      | FRQYTAFTL   | 39        |
| Pol     | 817-825              | 9      | IHGQANSDL   | 65        |
| Env     | 230-240              | 11     | FRYCAPPGYAL | 101       |
| Vpx     | 38-46                | 9      | NHLPRELIF   | 144       |
| Env     | 184-192              | 9      | NETWYSADL   | 147       |
| Pol     | 333-340              | 8      | RQYTAFTL    | 151       |
| Gag     | 42-50                | 9      | DRFGLAESL   | 177       |
| Env     | 35-42                | 8      | WRNATIPL    | 200       |
| Vif     | 65-75                | 11     | SHLEVQGYWHL | 209       |
| Env     | 769-776              | 8      | IHFLIRQL    | 223       |
| Vpr     | 33-43                | 11     | KHFDPRLLTAL | 227       |

|          |         |    |             |      |
|----------|---------|----|-------------|------|
| Pol      | 368-376 | 9  | FQYTMRHVL   | 234  |
| Pol      | 760-769 | 10 | SQGIRQVLFL  | 242  |
| Env      | 562-569 | 8  | VQQQQQLL    | 254  |
| Env      | 735-743 | 9  | THIQQDPAL   | 306  |
| Env      | 792-802 | 11 | SRVYQILQPIL | 310  |
| Pol      | 104-114 | 11 | DRGFAAPQFSL | 322  |
| Gag      | 42-51   | 10 | DRFGLAESLL  | 325  |
| Pol      | 105-114 | 10 | RGFAAPQFSL  | 359  |
| Env      | 782-790 | 9  | WLFSNCRTL   | 379  |
| Gag      | 195-202 | 8  | DHQAAMQI    | 380  |
| Pol      | 289-298 | 10 | NRVTQDFTEV  | 447  |
| Gag      | 195-203 | 9  | DHQAAMQII   | 473  |
| Vpr      | 71-78   | 8  | MHFRGGCI    | 498  |
| Pol      | 321-328 | 8  | DAYFSIPL    | 520  |
| Pol      | 364-372 | 9  | SPAIFQYTM   | 523  |
| Env      | 768-776 | 9  | YIHFLIRQL   | 538  |
| Env      | 35-43   | 9  | WRNATIPLF   | 599  |
| Vpr      | 33-40   | 8  | KHFDPRLL    | 627  |
| Env      | 769-777 | 9  | IHFLIRQLI   | 683  |
| Nef open | 165-174 | 10 | IRYPKTFGWL  | 837  |
| Gag      | 196-203 | 8  | HQAAMQII    | 853  |
| Env      | 769-779 | 11 | IHFLIRQLIRL | 879  |
| Pol      | 192-202 | 11 | NIFGRNLLTAL | 880  |
| Env      | 441-450 | 10 | WHKVGKNVYL  | 882  |
| Rev      | 73-81   | 9  | IQQLQNLAI   | 886  |
| Rev      | 45-53   | 9  | RRWQQLLAL   | 900  |
| Env      | 476-484 | 9  | NQTNITMSA   | 932  |
| Vif      | 109-117 | 9  | LHSTYFPCF   | 949  |
| Pol      | 567-574 | 8  | THTNGVRL    | 962  |
| Vif      | 140-148 | 9  | AHKYQVPSL   | 966  |
| Gag      | 275-284 | 10 | VRMYNPTNIL  | 1000 |
| Env      | 6-14    | 9  | NQLLIAILL   | 1140 |
| Env      | 870-878 | 9  | IRQGLELTL   | 1154 |
| Env      | 764-771 | 8  | WQIEYIHF    | 1243 |
| Rev      | 43-53   | 11 | WRRRWQQLLAL | 1265 |
| Vpr      | 66-73   | 8  | QRALFMHF    | 1313 |
| Pol      | 389-396 | 8  | VQYMDDIL    | 1477 |
| Pol      | 366-376 | 11 | AIFQYTMRHVL | 1543 |
| Pol      | 621-629 | 9  | WDFISTPPL   | 1549 |
| Pol      | 320-328 | 9  | GDAYFSIPL   | 1551 |
| Pol      | 192-201 | 10 | NIFGRNLLTA  | 1666 |

|          |         |    |             |      |
|----------|---------|----|-------------|------|
| Env      | 232-240 | 9  | YCAPPGYAL   | 1750 |
| Pol      | 759-769 | 11 | VSQGIRQVLFL | 1754 |
| Env      | 209-216 | 8  | NHCNTSVI    | 1777 |
| Vpr      | 71-80   | 10 | MHFRGGCIHS  | 1888 |
| Gag      | 263-271 | 9  | YRRWIQLGL   | 1984 |
| Pol      | 844-851 | 8  | VHVASGFI    | 1986 |
| Env      | 476-486 | 11 | NQTNITMSAEV | 2046 |
| Gag      | 145-154 | 10 | VHLPLSPRTL  | 2272 |
| Env      | 6-13    | 8  | NQLLIAIL    | 2382 |
| Gag      | 32-41   | 10 | KHVVWAANEL  | 2471 |
| Pol      | 844-852 | 9  | VHVASGFIE   | 2498 |
| Env      | 541-550 | 10 | SAMGAASLTL  | 2509 |
| Pol      | 862-871 | 10 | RQTALFLLKL  | 2545 |
| Env      | 792-801 | 10 | SRVYQILQPI  | 2573 |
| Env      | 691-699 | 9  | IQYGVYIVV   | 2599 |
| Vpr      | 71-81   | 11 | MHFRGGCIHSR | 2731 |
| Env      | 554-562 | 9  | SRTLLAGIV   | 2958 |
| Pol      | 760-767 | 8  | SQGIRQVL    | 3022 |
| Pol      | 844-853 | 10 | VHVASGFIEA  | 3053 |
| Gag      | 429-437 | 9  | DRQAGFLGL   | 3228 |
| Env      | 838-845 | 8  | WRSATETL    | 3351 |
| Pol      | 433-442 | 10 | PPFQWMGYEL  | 3523 |
| Gag      | 57-64   | 8  | CQKILSVL    | 3891 |
| Env      | 522-530 | 9  | RNKRGVFL    | 3911 |
| Env      | 290-298 | 9  | WHGRDNRTI   | 4204 |
| Pol      | 977-987 | 11 | IQFQQSKNSKF | 4222 |
| Vif      | 22-30   | 9  | WHSLIKYLK   | 4487 |
| Env      | 823-830 | 8  | LQYGWSYF    | 4511 |
| Gag      | 261-269 | 9  | NIYRRWIQL   | 4680 |
| Vpx      | 38-48   | 11 | NHLPRELIFQV | 4694 |
| Nef open | 138-146 | 9  | RHRILDIYL   | 4763 |
| Pol      | 677-686 | 10 | EQTTNQQAEL  | 4880 |
| Env      | 521-530 | 10 | SRNKRGVFL   | 4904 |
| Nef open | 120-129 | 10 | SHFIKEKGGL  | 4996 |
| Env      | 773-780 | 8  | IRQLIRLL    | 5140 |
| Pol      | 104-112 | 9  | DRGFAAPQF   | 5803 |
| Env      | 48-58   | 11 | NRDTWGTTQCL | 5992 |
| Gag      | 430-437 | 8  | RQAGFLGL    | 6002 |
| Env      | 782-791 | 10 | WLFSNCRTLL  | 6561 |
| Env      | 707-714 | 8  | VIYIVQML    | 6688 |
| Env      | 834-842 | 9  | VQAVWRSAT   | 6827 |

|          |         |    |             |       |
|----------|---------|----|-------------|-------|
| Pol      | 464-472 | 9  | DIQKLVGVL   | 6888  |
| Env      | 769-778 | 10 | IHFLIRQLIR  | 7047  |
| Vif      | 123-131 | 9  | RRAIRGEQL   | 7053  |
| Tat      | 61-68   | 8  | YHCQFCFL    | 7461  |
| Nef open | 139-146 | 8  | HRILDIYL    | 7550  |
| Pol      | 613-623 | 11 | WQVTWIPEWDF | 7704  |
| Pol      | 922-932 | 11 | NHHLKNQIDRI | 7714  |
| Pol      | 862-869 | 8  | RQTALFLL    | 7907  |
| Pol      | 984-992 | 9  | NSKFKNFRV   | 7913  |
| Vpx      | 38-45   | 8  | NHLPRELI    | 8058  |
| Env      | 322-330 | 9  | VTIMSGLVF   | 8215  |
| Vif      | 43-51   | 9  | PHFKVGWAW   | 8295  |
| Pol      | 884-893 | 10 | NGANFASQEV  | 8618  |
| Env      | 700-708 | 9  | GVILLRIVI   | 9330  |
| Env      | 290-299 | 10 | WHGRDNRTII  | 9744  |
| Vif      | 87-96   | 10 | VRITWYSKNF  | 9917  |
| Pol      | 122-132 | 11 | AHIEGQPVEVL | 10494 |
| Vif      | 141-151 | 11 | HKYQVPSLQYL | 11201 |
| Env      | 708-717 | 10 | IYIVQMLAKL  | 11254 |
| Env      | 773-783 | 11 | IRQLIRLLTWL | 11977 |
| Env      | 870-879 | 10 | IRQGLELTLL  | 12516 |
| Nef open | 108-115 | 8  | LRTMSYKL    | 13247 |
| Pol      | 623-632 | 10 | FISTPPLVRL  | 13793 |
| Env      | 547-557 | 11 | SLTLTAQSRTL | 14009 |
| Env      | 705-714 | 10 | RIVYIVQML   | 14188 |
| Env      | 795-805 | 11 | YQILQPILQRL | 14750 |
| Gag      | 314-322 | 9  | VKNWMTQTL   | 15268 |
| Env      | 540-550 | 11 | GSAMGAASLTL | 15924 |
| Pol      | 759-767 | 9  | VSQGIRQVL   | 15943 |
| Vif      | 202-210 | 9  | NFPGLAKVL   | 16900 |
| Rev      | 12-20   | 9  | KRLRLIHLL   | 17284 |
| Nef open | 8-16    | 9  | RRSRPSGDL   | 18041 |
| Env      | 432-441 | 10 | CHIRQIINTW  | 18059 |
| Gag      | 371-379 | 9  | ALAPVPIPF   | 19340 |
| Env      | 6-15    | 10 | NQLLIAILLL  | 19759 |
| Pol      | 192-200 | 9  | NIFGRNLLT   | 21621 |
| Pol      | 192-199 | 8  | NIFGRNLL    | 22948 |
| Rev      | 43-51   | 9  | WRRRWQQLL   | 23095 |
| Pol      | 389-397 | 9  | VQYMDDILI   | 25224 |
| Env      | 479-487 | 9  | NITMSAEVA   | 25358 |
| Env      | 292-301 | 10 | GRDNRTIISL  | 25541 |

|     |         |    |             |       |
|-----|---------|----|-------------|-------|
| Env | 704-714 | 11 | LRIVYIVQML  | 25774 |
| Pol | 292-300 | 9  | TQDFTEVQL   | 25861 |
| Env | 311-320 | 10 | CRRPGNKTVL  | 26175 |
| Env | 232-241 | 10 | YCAPPGYALL  | 27487 |
| Vif | 135-145 | 11 | CRFPRAHKYQV | 27716 |
| Vpx | 33-40   | 8  | NREAVNHL    | 29524 |
| Env | 868-876 | 9  | RRIRQGLEL   | 30416 |
| Env | 787-797 | 11 | CRTLLSRVYQI | 30502 |
| Env | 717-725 | 9  | LRQGYRPVF   | 31731 |
| Pol | 922-930 | 9  | NHHLKNQID   | 32796 |
| Vif | 138-148 | 11 | PRAHKYQVPSL | 32852 |
| Env | 733-743 | 11 | QQTHIQQDPAL | 34417 |
| Env | 704-713 | 10 | LRIVYIVQM   | 37943 |
| Env | 16-24   | 9  | SVYGIYCTL   | 38700 |
| Env | 834-843 | 10 | VQAVWRSATE  | 40365 |
| Env | 675-684 | 10 | WDVFGNWFDL  | 41269 |
| Gag | 57-67   | 11 | CQKILSVLAPL | 43294 |
| Env | 691-701 | 11 | IQYGVYIVVGV | 44298 |
| Env | 823-831 | 9  | LQYGWSYFH   | 46107 |
| Vif | 200-210 | 11 | GANFPGLAKVL | 46361 |
| Vif | 43-53   | 11 | PHFKVGWAWWT | 47973 |
| Gag | 261-271 | 11 | NIYRRWIQLGL | 48855 |
| Pol | 863-871 | 9  | QTALFLLKL   | 50331 |
| Env | 725-732 | 8  | FSSPPSYF    | 50331 |
| Env | 787-795 | 9  | CRTLLSRVY   | 50999 |
| Vpr | 92-101  | 10 | SAIPPSRSM   | 51261 |
| Pol | 922-929 | 8  | NHHLKNQI    | 52705 |
| Env | 119-127 | 9  | DRWGLTKSI   | 53723 |
| Rev | 43-50   | 8  | WRRRWQQL    | 53931 |
| Pol | 298-308 | 11 | VQLGIPHPAGL | 55559 |
| Pol | 262-269 | 8  | NPYNTPTF    | 59045 |
| Gag | 138-145 | 8  | QQIGGNYV    | 63987 |
| Env | 486-494 | 9  | VAELYRLEL   | 65932 |
| Vpr | 71-79   | 9  | MHFRGGCIH   | 68519 |
| Gag | 277-284 | 8  | MYNPTNIL    | -     |
| Gag | 316-323 | 8  | NWMTQTLL    | -     |
| Gag | 297-305 | 9  | YVDRFYKSL   | -     |
| Gag | 299-307 | 9  | DRFYKSLRA   | -     |
| Gag | 487-495 | 9  | SREKPYKEV   | -     |
| Gag | 138-147 | 10 | QQIGGNYVHL  | -     |
| Gag | 151-160 | 10 | PRTLNAWVKL  | -     |



|     |         |    |             |   |
|-----|---------|----|-------------|---|
| Gag | 196-206 | 11 | HQAAMQIIRDI | - |
| Pol | 105-112 | 8  | RGFAAPQF    | - |
| Pol | 828-835 | 8  | WQMDCTHL    | - |
| Pol | 873-880 | 8  | GRWPITHL    | - |
| Pol | 918-925 | 8  | VEAMNHHL    | - |
| Pol | 195-203 | 9  | GRNLLTALG   | - |
| Pol | 277-285 | 9  | NKWRMLIDF   | - |
| Pol | 279-287 | 9  | WRMLIDFRE   | - |
| Pol | 570-578 | 9  | NGVRLLAHV   | - |
| Pol | 760-768 | 9  | SQGIRQVLF   | - |
| Pol | 764-772 | 9  | RQVLFLEKI   | - |
| Pol | 871-880 | 10 | LAGRWPITHL  | - |
| Pol | 322-332 | 11 | AYFSIPLDEEF | - |
| Pol | 840-850 | 11 | IIVAVHVASGF | - |
| Pol | 844-854 | 11 | VHVASGFIEAE | - |
| Vif | 135-142 | 8  | CRFPRAHK    | - |
| Vif | 171-179 | 9  | WRRDNRRGL   | - |
| Vif | 175-183 | 9  | NRRGLRMAK   | - |
| Vif | 43-52   | 10 | PHFKVGWAWW  | - |
| Vif | 98-108  | 11 | TDVTPNYADIL | - |
| Vpx | 65-74   | 10 | SYVKYRYLCL  | - |
| Vpr | 49-57   | 9  | NRHGDTLEG   | - |
| Vpr | 62-70   | 9  | IRILQRALF   | - |
| Tat | 103-111 | 9  | NRTRHCQPE   | - |
| Tat | 63-72   | 10 | CQFCFLKKGL  | - |
| Tat | 118-128 | 11 | VEKAVATAPGL | - |
| Rev | 70-79   | 10 | DLAIQQLQNL  | - |
| Rev | 47-57   | 11 | WQQLLALADRI | - |
| Env | 244-251 | 8  | NDTNYSGF    | - |
| Env | 295-302 | 8  | NRTIISLN    | - |
| Env | 432-439 | 8  | CHIRQIIN    | - |
| Env | 675-682 | 8  | WDVFGNWF    | - |
| Env | 857-864 | 8  | RRGGRWIL    | - |
| Env | 61-69   | 9  | NGDYSEVAL   | - |
| Env | 222-230 | 9  | KHYWDAIRF   | - |
| Env | 226-234 | 9  | DAIRFRYCA   | - |
| Env | 284-292 | 9  | NRTYIYWHG   | - |
| Env | 540-548 | 9  | GSAMGAASL   | - |
| Env | 575-583 | 9  | QQELLRLTV   | - |
| Env | 665-673 | 9  | NMYELQKLN   | - |
| Env | 696-704 | 9  | YIVVGVILL   | - |

|          |         |    |              |   |
|----------|---------|----|--------------|---|
| Env      | 857-865 | 9  | RRGGRWILA    | - |
| Env      | 151-160 | 10 | CIAQDNCTGL   | - |
| Env      | 209-218 | 10 | NHCNTSVIQE   | - |
| Env      | 619-628 | 10 | TTVPWPNASL   | - |
| Env      | 823-832 | 10 | LQYGWSYFHE   | - |
| Env      | 456-466 | 11 | DLTCNSTVTSL  | - |
| Env      | 460-470 | 11 | NSTVTSLIANI  | - |
| Env      | 479-489 | 11 | NITMSAEVAEL  | - |
| Env      | 707-717 | 11 | VIIYIVQMLAKL | - |
| Env      | 823-833 | 11 | LQYGWSYFHEA  | - |
| Env      | 834-844 | 11 | VQAVWRSATET  | - |
| Nef open | 134-142 | 9  | YSARRHRIL    | - |
| Nef open | 203-211 | 9  | WDDPWGEVL    | - |
| Nef open | 245-253 | 9  | RRRLTARGL    | - |
| Nef open | 21-31   | 11 | LRARGETYGRL  | - |
| Nef open | 40-50   | 11 | SQSPGGLDKGL  | - |

A dash indicates IC50 >70000 nM.

1  
2  
3  
4  
5

**Supplemental Table 4.** Comparison of peptide binding to Mamu A1\*007:01 versus HLA B\*3801.

| Protein | Amino acid positions | Length | Sequence    | IC50 nM | HLA B*3801 | Recognized | Optimal epitope | Final optimal |
|---------|----------------------|--------|-------------|---------|------------|------------|-----------------|---------------|
| Vpr     | 45-55                | 11     | NHIYNRHGDTL | 0.20    | <b>19</b>  | Yes        | Yes             | 1             |
| Env     | 764-772              | 9      | WQIEYIHFL   | 3.2     | <b>2.4</b> | -          | -               | 0             |
| Pol     | 782-789              | 8      | YHSNVKEL    | 5.8     | <b>364</b> | Yes        | Yes             | 1             |
| Pol     | 782-791              | 10     | YHSNVKELVF  | 6.2     | <b>5.2</b> | Yes        | -               | 0             |
| Vif     | 22-29                | 8      | WHSLIKYL    | 10      | 1630       | -          | -               | 0             |
| Pol     | 279-288              | 10     | WRMLIDFREL  | 10      | <b>3.2</b> | -          | -               | 0             |
| Vif     | 145-153              | 9      | VPSLQYLAL   | 13      | 1526       | Yes        | Yes             | 1             |
| Pol     | 567-575              | 9      | THTNGVRL    | 13      | 617        | Yes        | Yes             | 1             |
| Env     | 795-802              | 8      | YQILQPIL    | 24      | 39143      | -          | -               | 0             |
| Pol     | 332-340              | 9      | FRQYTAFTL   | 39      | <b>17</b>  | -          | -               | 0             |
| Pol     | 817-825              | 9      | IHGQANSDL   | 65      | 2361       | Yes        | -               | 0             |

|     |         |    |                 |     |            |     |     |   |
|-----|---------|----|-----------------|-----|------------|-----|-----|---|
| Env | 230-240 | 11 | FRYCAPPGYAL     | 101 | <b>8.4</b> | Yes | -   | 0 |
| Vpx | 38-46   | 9  | NHLPRELIF       | 144 | 1123       | -   | -   | 0 |
| Env | 184-192 | 9  | NETWYSADL       | 147 | 3924       | -   | -   | 0 |
| Pol | 333-340 | 8  | RQYTAFTL        | 151 | 1321       | -   | -   | 0 |
| Gag | 42-50   | 9  | DRFGLAESL       | 177 | <b>30</b>  | Yes | Yes | 1 |
| Env | 35-42   | 8  | WRNATIPL        | 200 | 2259       | -   | -   | 0 |
| Vif | 65-75   | 11 | SHLEVQGYWH<br>L | 209 | <b>13</b>  | Yes | -   | 0 |
| Env | 769-776 | 8  | IHFLIRQL        | 223 | 11698      | -   | -   | 0 |
| Vpr | 33-43   | 11 | KHFDPRLLTAL     | 227 | 1107       | -   | -   | 0 |
| Pol | 368-376 | 9  | FQYTMRHVL       | 234 | 503        | -   | -   | 0 |
| Pol | 760-769 | 10 | SQGIRQVLFL      | 242 | <b>303</b> | Yes | Yes | 1 |
| Env | 562-569 | 8  | VQQQQQLL        | 254 | -          | -   | -   | 0 |
| Env | 735-743 | 9  | THIQQDPAL       | 306 | <b>148</b> | -   | -   | 0 |
| Env | 792-802 | 11 | SRVYQILQPIL     | 310 | <b>156</b> | -   | -   | 0 |
| Pol | 104-114 | 11 | DRGFAAPQFSL     | 322 | 581        | -   | -   | 0 |
| Gag | 42-51   | 10 | DRFGLAESLL      | 325 | <b>6.9</b> | Yes | -   | 0 |
| Pol | 105-114 | 10 | RGFAAPQFSL      | 359 | 10522      | -   | -   | 0 |
| Env | 782-790 | 9  | WLFSNCRTL       | 379 | 993        | -   | -   | 0 |
| Gag | 195-202 | 8  | DHQAAMQI        | 380 | 827        | -   | -   | 0 |
| Pol | 289-298 | 10 | NRVTQDFTEV      | 447 | 2380       | -   | -   | 0 |
| Gag | 195-203 | 9  | DHQAAMQII       | 473 | <b>125</b> | -   | -   | 0 |
| Vpr | 71-78   | 8  | MHFRGGCI        | 498 | <b>445</b> | -   | -   | 0 |

4/6 optimal

8/11 recognized

1  
2  
3

Supplementary Figure 1

|             |               |            |            |                     |            |
|-------------|---------------|------------|------------|---------------------|------------|
|             | Leader        |            | 1          |                     | 30         |
| A*07        | MAVMAPRTLLLVL | GVLALTETWA | GSHSMRYFYT | SMSRPGRGQP          | RFISVGYVDD |
| A*0702      | ~~~~~LS       | GVLALTETWA | GSHSMRYFYT | SMSRPGRGQP          | RFISVGYVDD |
| A*0702-like | ~~~~~LS       | GVLALTETWA | GSHSMRYFYT | SMSRPGRGQP          | RFISVGYVDD |
| A*0703      | MAVMAPRTLLLVL | GVLALTETWA | GSHSMRYFYT | SMSRPGRGQP          | RFISVGYVDD |
| A*0704      | ~~~~~VLS      | GVLALTETWA | GSHSMRYFYT | SMSRPGRGQP          | RFISVGYVDD |
| A*0705      | ~~~~~VLS      | GVLALTETWA | GSHSMRYFYT | SMSRPGRGQP          | RFISVGYVDD |
| A*0706      | ~~~~~VLS      | GVLALTETWA | GSHSMRYFYT | SMSR <b>H</b> GRGQP | RFISVGYVDD |
|             |               |            |            |                     |            |
|             |               |            | 31         |                     | 80         |
| A*07        | TQFVRFSDA     | ESPREEPRAP | WVEQEGPEYW | DRNTRICKAN          | TQTYRESLRN |
| A*0702      | TQFVRFSDA     | ESPREEPRAP | WVEQEGPEYW | DRNTRICKA <b>D</b>  | TQTYRESLRN |
| A*0702-like | TQFVRFSDA     | ESPREEPRAP | WVEQEGPEYW | DRNTRICKA <b>D</b>  | TQTYRESLRN |
| A*0703      | TQFVRFSDA     | ESPREEPRAP | WVEQEGPEYW | DRNTRICKAN          | TQTYRESLRN |
| A*0704      | TQFVRFSDA     | ESPREEPRAP | WVEQEGPEYW | DRNTRICKA <b>D</b>  | TQTYRESLRN |
| A*0705      | TQFVRFSDA     | ESPREEPRAP | WVEQEGPEYW | DRNTRICKAN          | TQTYRESLRN |
| A*0706      | TQFVRFSDA     | ESPREEPRAP | WVEQEGPEYW | DRNTRICKAN          | TQTYRESLRN |
|             |               |            |            |                     |            |
|             |               |            | 81         |                     | 130        |
| A*07        | LLRYYNQSEA    | GSHTIQRMYG | CDLGPDGRL  | RGYEQFAYDG          | RDYIALNEDL |
| A*0702      | LLRYYNQSEA    | GSHTIQRMYG | CDLGPDGRL  | RGYEQFAYDG          | RDYIALNEDL |
| A*0702-like | LLRYYNQSEA    | GSHTIQRMYG | CDLGPDGRL  | RGY <b>DQ</b> SAYDG | RDYIALNEDL |
| A*0703      | LLRYYNQSEA    | GSHTIQRMYG | CDLGPDGRL  | RGY <b>DQ</b> SAYDG | RDYIALNEDL |
| A*0704      | LLRYYNQSEA    | GSHTIQRMYG | CDLGPDGRL  | RGYEQFAYDG          | RDYIALNEDL |
| A*0705      | LLRYYNQSEA    | GSHTIQRMYG | CDLGPDGRL  | RGYEQFAYDG          | RDYIALNEDL |
| A*0706      | LLRYYNQSEA    | GSHTIQRMYG | CDLGPDGRL  | RGYEQFAYDG          | RDYIALNEDL |

|             |            |            |            |            |            |
|-------------|------------|------------|------------|------------|------------|
|             | 131        |            |            |            | 180        |
| A*07        | RSWTAADMAA | QNTQRKWEAA | GAAEQMRAYL | EGECLEWLRR | HLENGKETLQ |
| A*0702      | RSWTAADMAA | QNTQRKWEAA | GAAEQMRAYL | EGECLEWLRR | HLENGKETLQ |
| A*0702-like | RSWTAADMAA | QNTQRKWEAA | GAAEQMRAYL | EGECLEWLRR | HLENGKETLQ |
| A*0703      | RSWTAADMAA | QNTQRKWEAA | GAAEQMRAYL | EGECLEWLRR | HLENGKETLQ |
| A*0704      | RSWTAADLAA | QNTQRKWEAA | GVAEQDRVYL | EGKCLEWLRR | HLENGKETLQ |
| A*0705      | RSWTAADTAA | QNTQRKWEAA | GAAEQMRAYL | EGECLEWLRR | HLENGKETLQ |
| A*0706      | RSWTAADTAA | QNTQRKWEAA | GAAEQMRAYL | EGECLEWLRR | HLENGKETLQ |

|             |            |            |            |            |            |
|-------------|------------|------------|------------|------------|------------|
|             | 181        |            |            |            | 230        |
| A*07        | RADPPKTHVT | HHPVSDHEAT | LRCWALGFYP | AEITLTWORD | GEDQTQDTEL |
| A*0702      | RADPPKTHVT | HHPVSDHEAT | LRCWALGFYP | AEITLTWORD | GEDQTQDTEL |
| A*0702-like | RADPPKTHVT | HHPVSDHEAT | LRC~~~~~   | ~~~~~      | ~~~~~      |
| A*0703      | RADPPKTHVT | HHPVSDHEAT | LRCWALGFYP | AEITLTWORD | GEDQTQDTEL |
| A*0704      | RADPPKTHVT | HHPVSDHEAT | LRCWALGFYP | AEITLTWORD | GEDQTQDTEL |
| A*0705      | RADPPKTHVT | HHPVSDHEAT | LRCWALGFYP | AEITLTWORD | GEDQTQDTEL |
| A*0706      | RADPPKTHVT | HHPVSDHEAT | LRCWALGFYP | AEITLTWORD | GEDQTQDTEL |

|             |            |            |            |            |            |
|-------------|------------|------------|------------|------------|------------|
|             | 231        |            |            |            | 280        |
| A*07        | VETRPAGDGT | FQKWAAVVVP | SGKEQRYTCH | VQHEGLPKPL | TLRWEPSSES |
| A*0702      | VETRPAGDGT | FQKWAAVVVP | SGKEQRYTCH | VQHEGLPKPL | TLRWEPSSES |
| A*0702-like | ~~~~~      | ~~~~~      | ~~~~~      | ~~~~~      | ~~~~~      |
| A*0703      | VETRPAGDGT | FQKWAAVVVP | SGKEQRYTCH | VQHEGLPKPL | TLRWEPSSES |
| A*0704      | VETRPAGDGT | FQKWAAVVVP | SGEQRYTCH  | VQHEGLPEPL | TLRWEPSSES |
| A*0705      | VETRPAGDGT | FQKWAAVVVP | SGKEQRYTCH | VQHEGLPKPL | TLRWEPSSES |
| A*0706      | VETRPAGDGT | FQKWAAVVVP | SGKEQRYTCH | VQHEGLPKPL | TLRWEPSSES |

|             |            |            |            |            |            |
|-------------|------------|------------|------------|------------|------------|
|             | 281        |            |            |            | 330        |
| A*07        | TIPIVGIIAG | LVLLGAVVTG | AVVAAVMWWR | KSSDRKGGSY | SQAASSDSAQ |
| A*0702      | TIPIVGIIAG | LVLLGAVVTG | AVVAAVMWWR | KSSDRKGGSY | SQAASSDSAQ |
| A*0702-like | ~~~~~      | ~~~~~      | ~~~~~      | ~~~~~      | ~~~~~      |
| A*0703      | TIPIVGIIAG | LVLLGAVVTG | AVVAAVMWWR | KSSDRKGGSY | SQAASSDSAQ |
| A*0704      | TIPIVGIIAG | LVLLGAVVTG | AVVAVVMWRR | KSSDRKGGSY | SQAASSDSAQ |
| A*0705      | TIPIVGIIAG | LVLLGAVVTG | AVVAAVMWWR | KSSDRKGGSY | SQAASSDSAQ |
| A*0706      | TIPIVGIIAG | LVLLGAVVTG | AVVAAVMWWR | KSSDRKGGSY | SQAASSDSAQ |

|             |             |
|-------------|-------------|
|             | 331         |
| A*07        | GSDVSLTACKV |
| A*0702      | GSDVSLTACKV |
| A*0702-like | ~~~~~       |
| A*0703      | GSDVSLTACKV |
| A*0704      | GSDVSLTACKV |
| A*0705      | GSDVSLTACKV |
| A*0706      | GSDVSLTACKV |
